# Supplementary material for: Highly sensitive and multiplexed analysis of CpG methylation at single-base resolution with ligation-based exponential amplification
Source: Royal Society of Chemistry journal article supplement (doi:10.1039/c4sc03135k), 2014-12-11
Supplement: c4sc03135k1.pdf [file c4sc03135k1.pdf]

## Electronic Supplementary Information

### Highly Sensitive and Multiplexed Analysis of CpG Methylation at Single-base Resolution with Ligation-Based Exponential Amplification

Fengxia Su,<sup>a</sup> Limei Wang,<sup>a</sup> Yueying Sun,<sup>a</sup> Chenghui Liu,<sup>b</sup> Xinrui Duan,<sup>b</sup> and Zhengping Li <sup>\*,ab</sup>

<sup>a</sup> Key Laboratory of Medicinal Chemistry and Molecular Diagnosis, Ministry of Education; College of Chemistry and Environmental Science, Hebei University, Baoding 071002, Hebei Province, P. R. China.

<sup>b</sup> Key Laboratory of Applied Surface and Colloid Chemistry, Ministry of Education; Key Laboratory of Analytical Chemistry for Life Science of Shaanxi Province, School of Chemistry and Chemical Engineering, Shaanxi Normal University, Xi'an 710062, Shaanxi Province, P. R. China

**Email:** [lzpbd@snnu.edu.cn](mailto:lzpbd@snnu.edu.cn)

#### List of Contents:

1. Table S1. The sequences of targets and probes used in the experiments.
2. The electropherograms for detection of target M<sub>1</sub> at different concentrations.
3. The analytical performance of the LCR-based assay for detection target N<sub>1</sub>.
4. The electropherograms for detection of target M<sub>1</sub> in the mixture samples of target M<sub>1</sub> and target N<sub>1</sub>.

**1. Table S1. The sequences of targets and probes used in the experiments (5'-3').**

| Targets and probes     | Sequences                                                                  |
|------------------------|----------------------------------------------------------------------------|
| Target M <sub>1</sub>  | GGAGGTTAAGGTTGTTTCGTACGGTTCGG <u>C</u> GGGCGAGCGAG<br>TTCGGGTTGTAGTAGTTT   |
| Probe A <sub>M1</sub>  | Phosphate-CCGAACCGTACGAAACAACCTTAACCTCC                                    |
| Probe B <sub>M1</sub>  | AAAAACTACTACAACCCGAACTCGCTCGCCCCG                                          |
| Probe A' <sub>M1</sub> | FAM-AAGGAGGTTAAGGTTGTTTCGTACGGTTCGGC                                       |
| Probe B' <sub>M1</sub> | Phosphate-GGGCGAGCGAGTTCGGGTTGTAGTAGTTT                                    |
| Target N <sub>1</sub>  | GGAGGTTAAGGTTGTTTTGTATGGTTTGG <u>T</u> GGGTGAGTGAG<br>TTTGGGTTGTAGTAGTTT   |
| Probe A <sub>N1</sub>  | Phosphate-CCAAACCATACAAAACAACCTTAACCTCC                                    |
| Probe B <sub>N1</sub>  | AAAAACTACTACAACCCAAACTCACTCACCCA                                           |
| Probe A' <sub>N1</sub> | TAMRA-AAGGAGGTTAAGGTTGTTTTGTATGGTTTGGT                                     |
| Probe B' <sub>N1</sub> | Phosphate-GGGTGAGTGAGTTTGGGTTGTAGTAGTTT                                    |
| Target M <sub>2</sub>  | TTTTTTTTTGGAGGGTTCGATGAGGTAATG <u>C</u> GGTTTTTGTTATT<br>GGTTTGAGGGGGCGGGT |
| Probe A <sub>M2</sub>  | Phosphate-CATTACCTCATCGACCCTCCAAAAAAAAA                                    |
| Probe B <sub>M2</sub>  | AAACCCGCCCCCTCAAACCAATAACAAAACCG                                           |
| Probe A' <sub>M2</sub> | FAM-AATTTTTTTTTTGGAGGGTTCGATGAGGTAATGC                                     |
| Probe B' <sub>M2</sub> | Phosphate-GGTTTTGTTATTGGTTTGAGGGGGCGGGTAAAAA                               |
| Target M <sub>3</sub>  | AGTTCGAGGCGGGGTTTTCGGGGGTTTAG <u>C</u> GTTATATTATTC<br>GGTCGTTTAGGTAGCGG   |
| Probe A <sub>M3</sub>  | Phosphate-CTAAACCCCCGAAAACCCCGCCTCGAACT                                    |
| Probe B <sub>M3</sub>  | AACCGCTACCTAAACGACCGAATAATATAACG                                           |
| Probe A' <sub>M3</sub> | FAM-AAAGTTCGAGGCGGGGTTTTCGGGGGTTTAGC                                       |
| Probe B' <sub>M3</sub> | Phosphate-<br>GTTATATTATTCGGTCGTTTAGGTAGCGGAAAAAAAAA                       |

**Note:** Target M<sub>1</sub>, target M<sub>2</sub>, and target M<sub>3</sub> are synthesized DNA fragments in the promoter region of TIMP-3 gene, which respectively contains the methylated CpG site 1, site 2, and site 3 (underlined in the sequence). The sequences of target M<sub>1</sub>, target M<sub>2</sub>, and target M<sub>3</sub> are corresponding to the methylated DNA sequences after bisulfite-treatment. The sequence of target N<sub>1</sub> is corresponding to

the unmethylated target  $M_1$  sequence after bisulfite-treatment, in which uracil is substituted by thymine. The relationship between other targets and their probes is the same as that between target  $M_1$  and their probes. The probe  $A_{M1}$ ,  $B_{M1}$ ,  $A'_{M1}$ ,  $B'_{M1}$ , probe  $A_{N1}$ ,  $B_{N1}$ ,  $A'_{N1}$ ,  $B'_{N1}$ , probe  $A_{M2}$ ,  $B_{M2}$ ,  $A'_{M2}$ ,  $B'_{M2}$ , and probe  $A_{M3}$ ,  $B_{M3}$ ,  $A'_{M3}$ ,  $B'_{M3}$  are specific to the target  $M_1$ , target  $N_1$ , target  $M_2$ , and target  $M_3$ , respectively.

## 2. The electropherograms for detection of target $M_1$ at different concentrations.

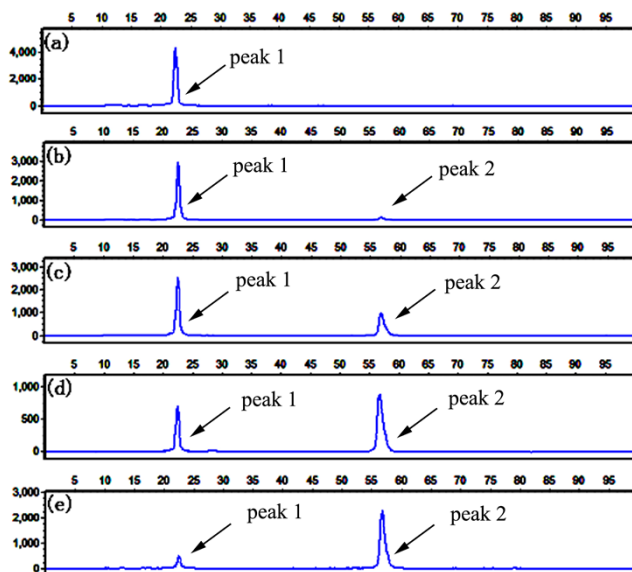

**Fig. S1.** The electropherograms for detection of target  $M_1$  at different concentrations with the LCR-based by using target  $M_1$ -specific probes (probe  $A_{M1}$ ,  $B_{M1}$ ,  $A'_{M1}$ , and  $B'_{M1}$ ). The concentration of target  $M_1$  is (a) blank, (b) 10 aM, (c) 100 aM, (d) 1 fM, and (e) 10 fM, respectively. The abscissa axis in the electropherograms represents the retention time and the longitudinal axis represents the relative fluorescence signal. Peak 1 is the signal of probe  $A'_{M1}$  and peak 2 is produced by the LCR products. The LCR-based assay is performed according to the procedures described in the Experimental methods.

## 3. The analytical performance of the LCR-based assay for detection target $N_1$ .

Besides the analytical performance evaluation for the detection of target  $M_1$ , we further

investigated the analytical performance of target  $N_1$  in order to validate the capability of the LCR-based assay. A series of dilution of target  $N_1$  were detected with the LCR-based assay by using target  $N_1$ -specific probes (probe  $A_{N_1}$ ,  $B_{N_1}$ ,  $A'_{N_1}$ , and  $B'_{N_1}$ ). As shown in Fig. S2, the peak area of LCR products gradually increased with increasing the target  $N_1$  concentration, while the peak area of FAM-labeled probe  $A'_{N_1}$  decreased. After calculating the relative peak area (RPA) for each concentration of target  $N_1$ , as depicted in Fig. S3, a good linear relationship between RPA(%) and logarithm (log) of target  $N_1$  concentration was obtained. The linear curve is fitted the equation of  $RPA(\%) = 366.84 + 21.47 \log C(M)$  and the corresponding correlation coefficient  $R$  is 0.999. The target  $N_1$  can be accurately detected as low as 10 aM, with a linear range of over 3 orders of magnitude.

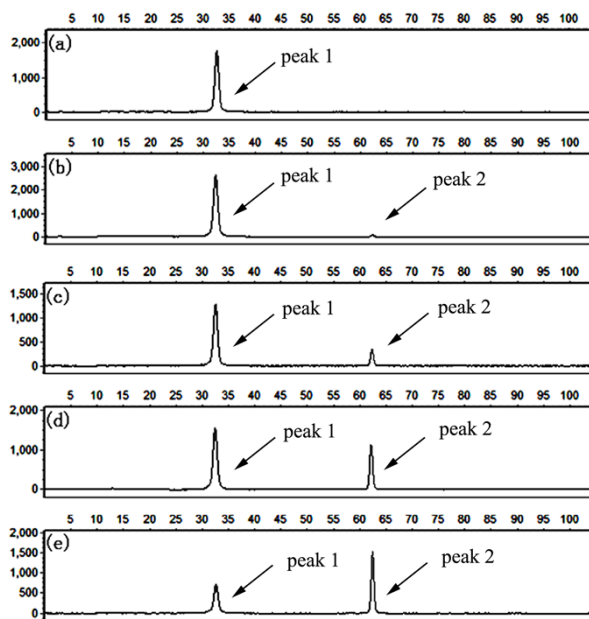

**Fig. S2.** The electropherograms for detection of target  $N_1$  at different concentrations with the LCR-based by using target  $N_1$ -specific probes (probe  $A_{N_1}$ ,  $B_{N_1}$ ,  $A'_{N_1}$ , and  $B'_{N_1}$ ). The concentration of target  $N_1$  is (a) blank, (b) 10 aM, (c) 100 aM, (d) 1 fM, and (e) 10 fM, respectively. Peak 1 is the signal of probe  $A'_{N_1}$  and peak 2 is produced by the LCR products. The experimental conditions are the same as described in Fig. S1.

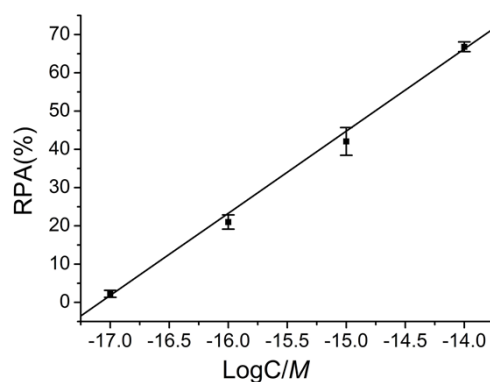

**Fig. S3.** The linear relationship between RPA(%) and log of target  $N_1$  concentration (M) in the LCR-based assay. The concentration of target  $N_1$  is 10 aM, 100 aM, 1 fM, and 10 fM, respectively. Error bars are estimated from the standard deviation of three repetitive measurements.

#### 4. The electropherograms for detection of target $M_1$ in the mixture samples of target $M_1$ and target $N_1$ .

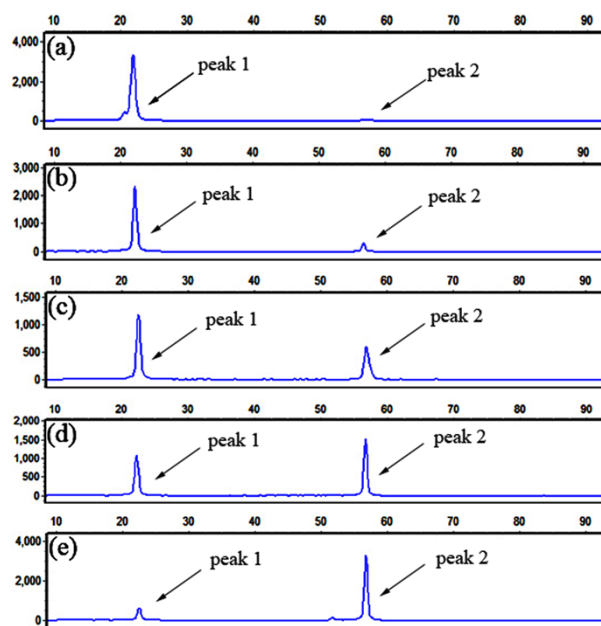

**Fig. S4.** The electropherograms for detection of target  $M_1$  with different proportions in the mixture of target  $N_1$  and target  $M_1$  with LCR-based assay by using target  $M_1$ -specific probes (probe  $A_{M1}$ ,  $B_{M1}$ ,  $A'_{M1}$ , and  $B'_{M1}$ ). The target  $M_1$  and target  $N_1$  are mixed with a fixed total concentration of 10

fM, in which the proportion of target  $M_1$  is 0%, 0.1%, 1%, 10%, and 100%, respectively. The peak 1 is the signal of probe  $A'_{M_1}$  and the peak 2 is generated by the LCR products. The experimental conditions are the same as that described in Experimental methods.
